# Supplementary material for: Cyclin K regulates prereplicative complex assembly to promote mammalian cell proliferation
Source: PubMed Central journal article supplement (PMC5951916; doi:10.1038/s41467-018-04258-w), 2018-05-14
Supplement: 41467_2018_4258_MOESM1_ESM.pdf [file 41467_2018_4258_MOESM1_ESM.pdf]

Supplementary Information for

**Cyclin K regulates prereplicative complex assembly to  
promote mammalian cell proliferation**

Lei et. al

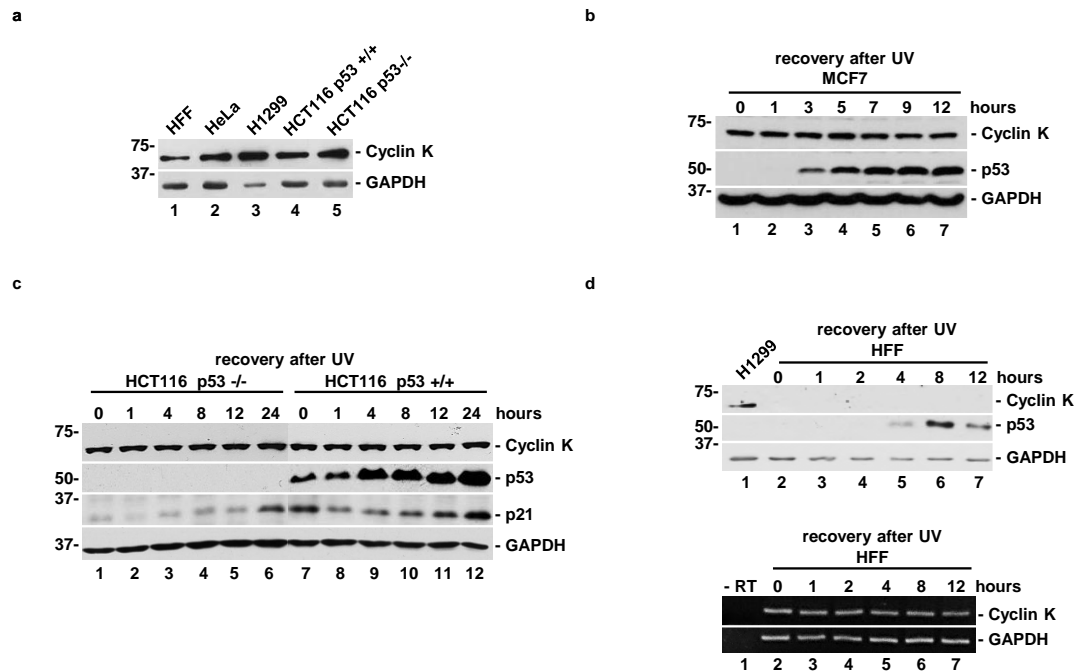

**Supplementary Fig. 1: Cyclin K expression is not regulated by p53 protein.**

**(a)** Expression analysis of cyclin K by immunoblotting in various cell lines. HFF, neonatal human foreskin fibroblast. p53 is inactivated in HeLa cells and null in H1299 cells. **(b)** Time course analyses of cyclin K expression by immunoblotting after ultraviolet radiation (UV, 40 J/m<sup>2</sup>) in MCF7 cells. **(c)** Time course analyses of cyclin K expression by immunoblotting after UV treatment in isogenic HCT116 colon cancer cell lines with wild-type or knockout of p53. **(d)** Time course analyses of cyclin K expression after UV treatment in normal human cells. Upper panel, protein blot analyses. Lower panel, analyses by reverse transcription polymerase chain reaction (RT). HFF, neonatal human foreskin fibroblast. All experiments were repeated three times and representative results are shown.

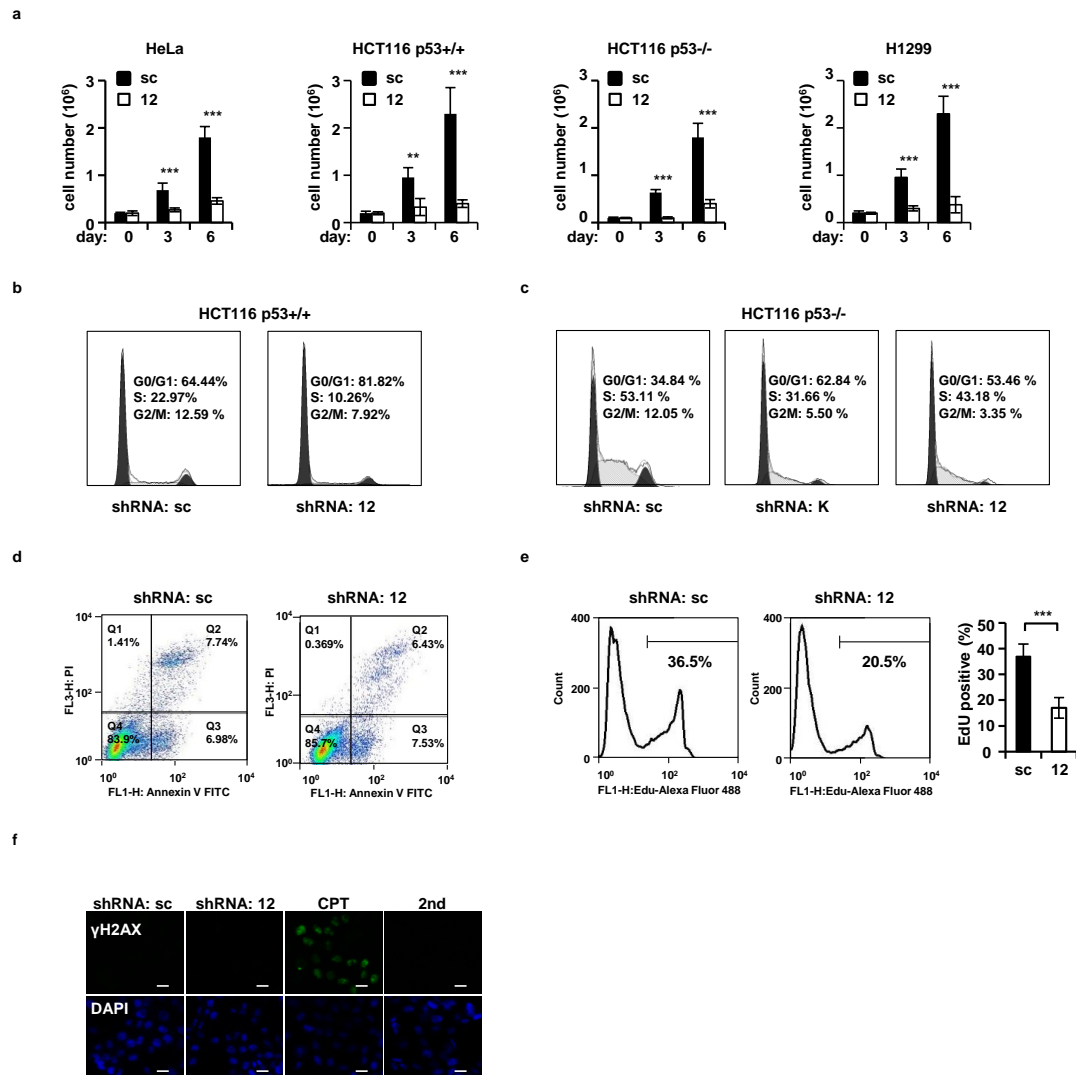

**Supplementary Fig. 2: Knockdown of CDK12 reduces cell proliferation, similar to knockdown of cyclin K.**

**(a)** Knockdown of CDK12 reduced proliferation in various human cancer cells. Data are means  $\pm$  SEM ( $n = 5$ ) (\*\* $p < 0.001$ ; Student's t-test). **(b)** Cell cycle profiling of HCT116 cells with or without CDK12 knockdown. **(c)** Cell cycle profiling of *p53*-null HCT116 cells with or without CDK12 knockdown. **(d)** The percentage of Annexin V-positive (marker of early apoptosis) HCT116 cells was similar with or without CDK12 knockdown. **(e)** Detection of EdU-positive (marker of proliferation) HCT116 cells by FACS analysis with or without CDK12 knockdown. Quantitation was generated from

five independent experiments. Data are means  $\pm$  SEM (n = 6) (\*\**p* < 0.001; Student's t-test). **(f)** Immunofluorescence analysis of  $\gamma$ H2AX (marker of DNA damage) in HCT116 cells with or without CDK12 knockdown. CPT was used as a positive control for DNA damage induction. Scale bar, 15  $\mu$ m. All experiments were repeated at least three times and representative results are shown.

post partial hepatectomy

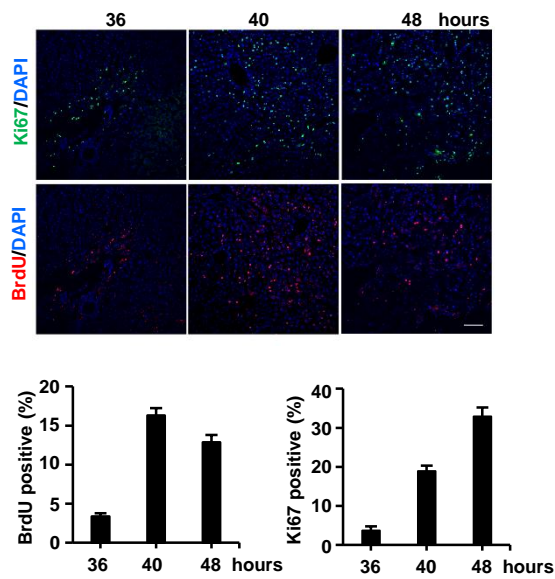

### Supplementary Fig. 3: Cell cycle reentry after partial hepatectomy.

Two hours before sacrifice, BrdU was injected into mice. BrdU was used to mark cells in the S phase, and Ki67 to label proliferating cells. Results were quantified from four mice at each time point. The differences on the time point of peak detection for BrdU and Ki67 were likely because BrdU labelling only detected proliferative cells in a 2-hour timeframe, while Ki67 detected all proliferative cells accumulated in the past 48-72 hours. The kinetics of cyclin K and Mcm2 accumulation mimicked that of Ki67. Scale bar, 100  $\mu$ m.

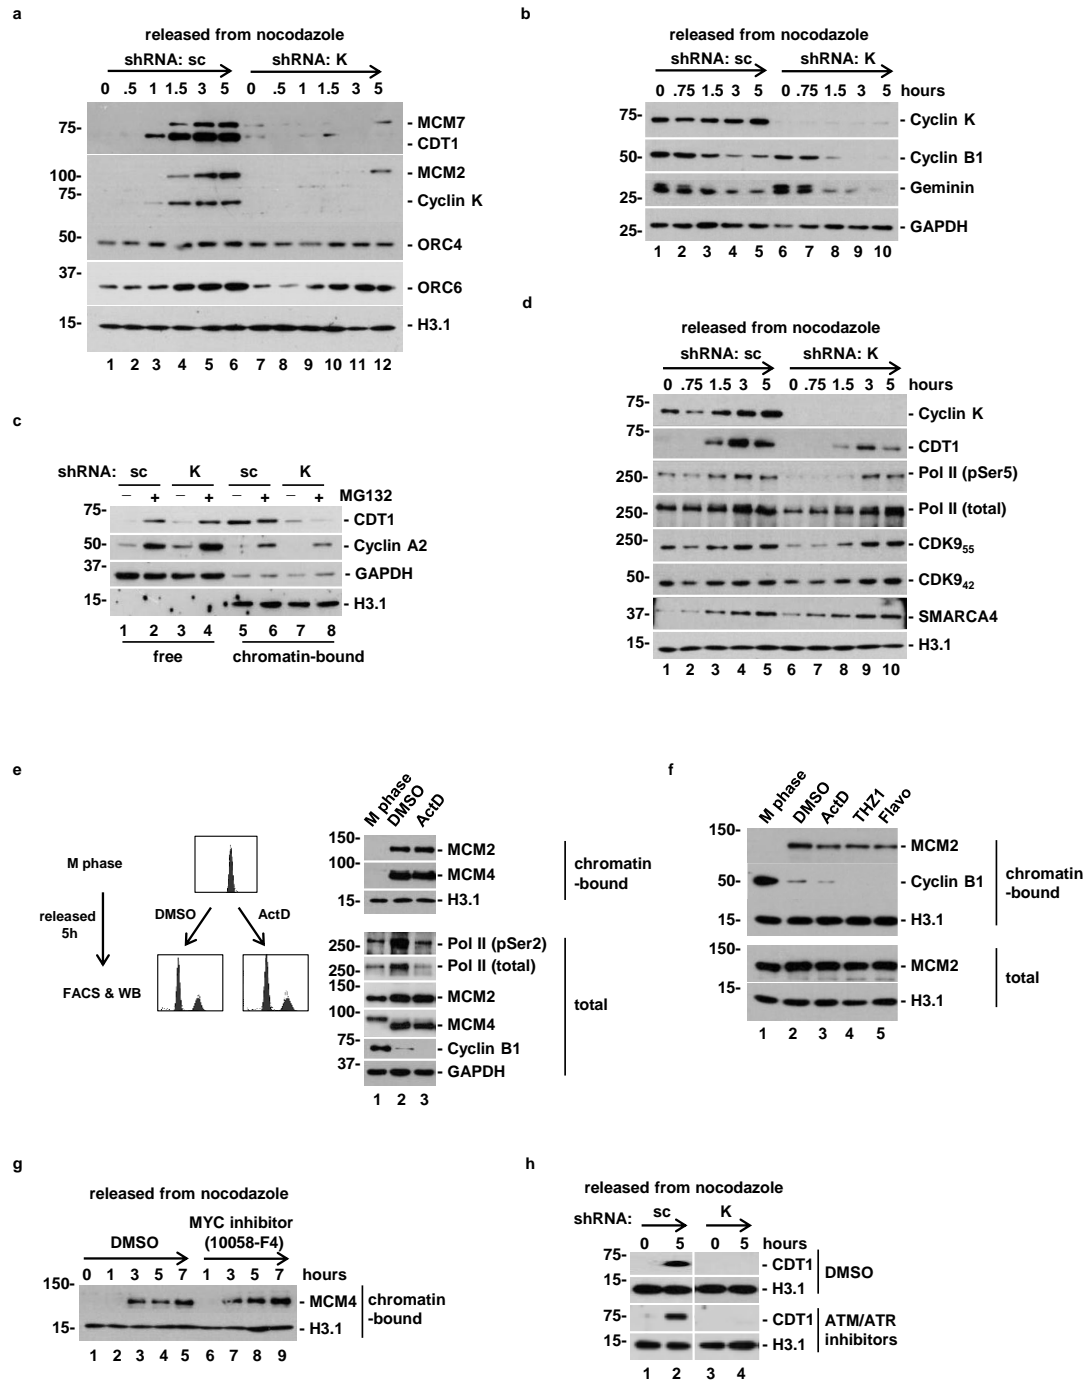

## Supplementary Fig. 4: Dissection of potential mechanisms how cyclin K

regulates pre-RC assembly.

(a) Analysis of the loading of ORC complex (ORC4 and ORC6) with or without cyclin K

knockdown in HCT116 cells. Knockdown of cyclin K did not perturb the loading

kinetics of ORC4 and ORC6. (b) Analysis of Geminin protein with or without cyclin K

knockdown in HCT116 cells. Knockdown of cyclin K did not perturb the kinetics of Geminin regulation in cell cycle. **(c)** Regulation of CDT1 by proteasome was similar with or without cyclin K knockdown in HCT116 cells. In addition, upregulation of CDT1 by MG132 treatment (5  $\mu$ M) failed to rescue the effect by cyclin K knockdown. **(d)** Loading of several general transcription apparatuses was comparable with or without cyclin K knockdown in HCT116 cells, indicating that cyclin K knockdown did not cause a global defect in chromatin organization. **(e)** Inhibition of global RNA polymerase II transcription elongation by actinomycin D (ActD, 500 ng/ml) did not affect pre-RC assembly in HCT116 cells. **(f)** Inhibition of global RNA polymerase II transcription by different inhibitors did not affect pre-RC assembly in HCT116 cells. THZ1 (250 nM) inhibits CDK7 to block global transcription initiation, and reduces both Ser2 and Ser5 phosphorylation RNA polymerase II CTD. Flavopiridol (500 nM) inhibits CDK9 to block global transcription elongation and reduce Ser2 phosphorylation. **(g)** Inhibition of c-MYC (10058-F4, 50  $\mu$ M) did not affect pre-RC assembly in HCT116 cells. **(h)** ATM and ATR inhibition failed to rescue CDT1 loading defect caused by cyclin K knockdown in HCT116 cells. Similar results were obtained from inhibition of ATM (KU-60019, 5  $\mu$ M) and ATR (VE-821, 5  $\mu$ M) in combination (shown here) or individually. All experiments were repeated at least three times and representative results are shown.

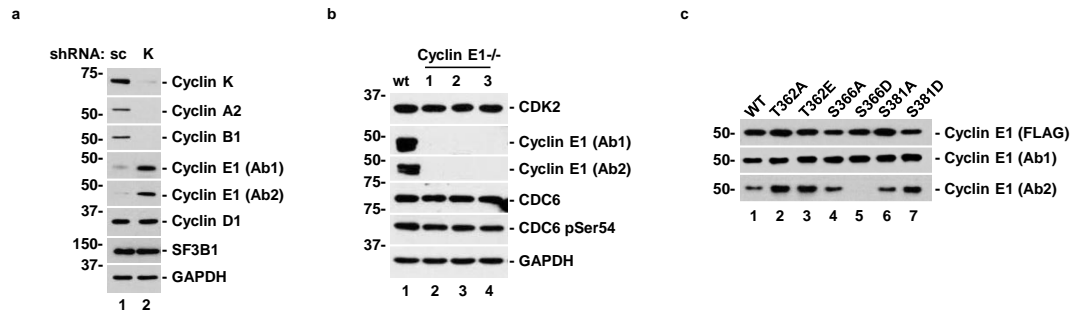

### Supplementary Fig. 5: Characterization of various anti-cyclin E1 antibodies.

**(a)** Similar experiment as in Fig. 5a except that Ab1 was a different batch from the same commercial vendor. Note that the band above 50 kD denoted by asterisk in Fig. 5a and 5b was absent. **(b)** Verification of cyclin E1 antibodies using *cyclin E1* knockout HCT116 cell lines. **(c)** Total cell lysates were derived from HEK293 cells transfected with indicated cDNA, and analyzed by protein blotting with indicated antibodies. All constructs were FLAG-tagged at the C-terminus. WT, wild-type cyclin E1. All experiments were repeated at least three times and representative results are shown.



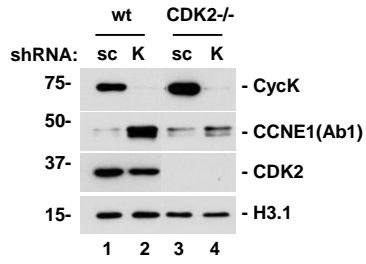

**Supplementary Fig. 6: The accumulation of cyclin E1 induced by cyclin K**

**knockdown is dependent on CDK2.**

*CDK2* knockout HCT116 cell lines (*CDK2*<sup>-/-</sup>) were generated by CRISPR/Cas9 technology. Total cell lysates were analyzed by immunoblotting with or without cyclin K knockdown for 3 days. wt, isogenic wild-type cells.

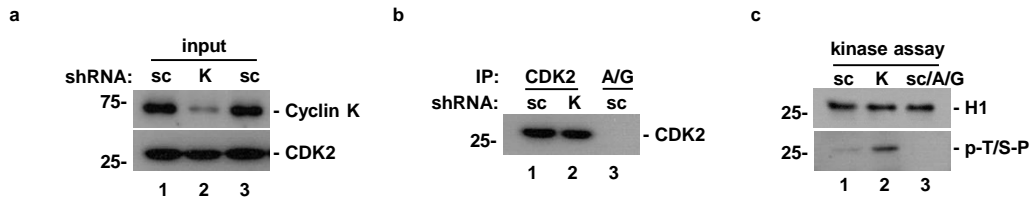

### Supplementary Fig. 7: CDK2 kinase assay.

**(a)** Input of total cell lysates for anti-CDK2 immunoprecipitation generated from HCT116 cells with or without cyclin K knockdown. Cyclin K knockdown did not affect endogenous CDK2 protein level. **(b)** Endogenous CDK2 was immunoprecipitated from cell lysates shown in **(a)**, and normalized to equal amount for *in vitro* kinase assay. A/G, protein A/G agarose beads was used for mock immunoprecipitation without anti-CDK2 antibodies. **(c)** Recombinant human histone H1 (H1) was used as substrate for purified CDK2 from **(b)**. Phospho-T/S-P antibodies were used for detection of phosphorylated H1 as an indication of endogenous CDK2 kinase activity.

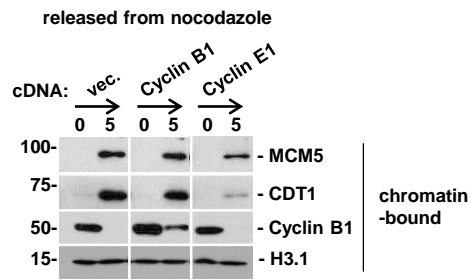

**Supplementary Fig. 8: Ectopic expression of cyclin B1 does not compromise pre-RC assembly.**

Either cyclin B1 or cyclin E1 was overexpressed in HCT116 cells, and pre-RC loading was similarly monitored as in Fig. 6a.

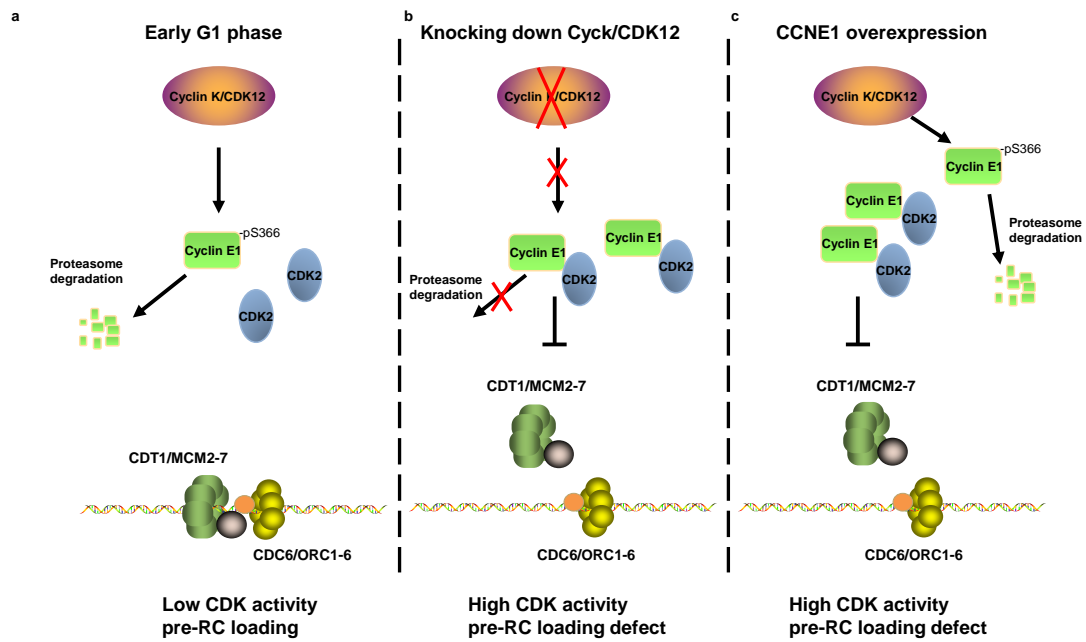

**Supplementary Fig. 9: Working model how cyclin K regulates pre-RC assembly.**

High level of CDK2/cyclin E1 activity in early G1 is detrimental to pre-RC assembly by preventing CDT1 and subsequent MCM loading. Under normal situation **(a)**, cyclin K/CDK12 directly or indirectly phosphorylates most cyclin E1 at S366 to prevent interaction with CDK2. Without interacting with CDK2, cyclin E1 is quickly degraded in cells so that CDK2 activity is low in G1, and pre-RC assembly is allowed. When cyclin K or CDK12 is knocked down **(b)**, S366 phosphorylation is lost, leading to increased cyclin E1/CDK2 activity in G1 to block pre-RC assembly. Likewise, when cyclin E1 is overexpressed **(c)**, there is not enough endogenous cyclin K/CDK12 to fully phosphorylates S366, leading to increased cyclin E1/CDK2 activity in G1. pre-RC assembly is compromised.

## Supplementary Fig. 10: Full images of western blots.

Full unprocessed images and signals detected by western blotting, with the regions used in the corresponding main display items indicated by red frames.

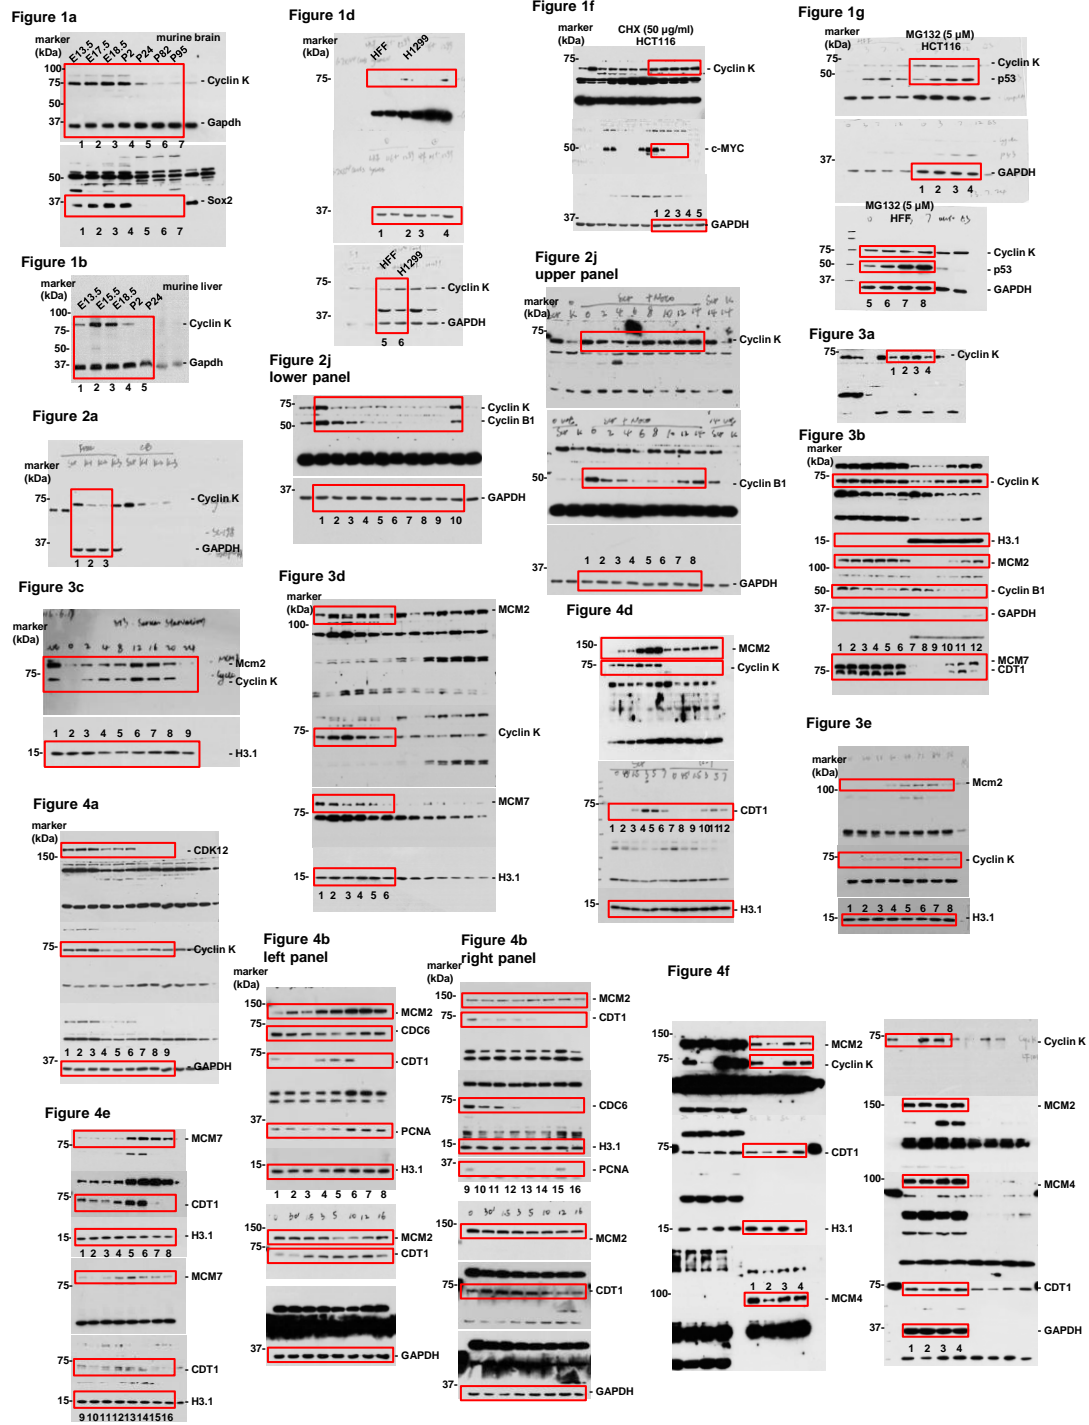

Figure 5a

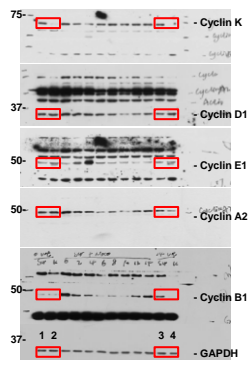

Figure 5b

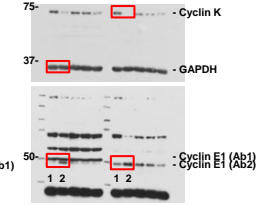

Figure 5c

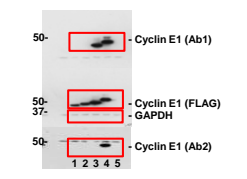

Figure 5d

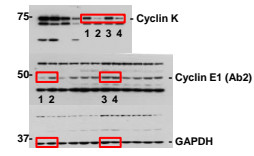

Figure 5g

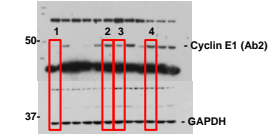

Figure 5h

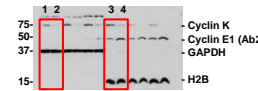

Figure 5e

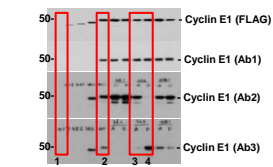

Figure 5f

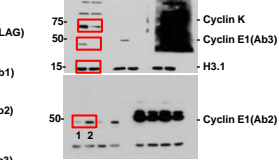

Figure 5m

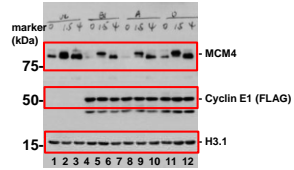

Figure 5i

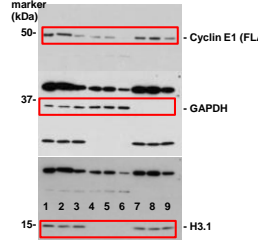

Figure 5j

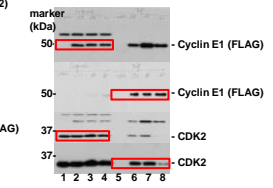

Figure 5l

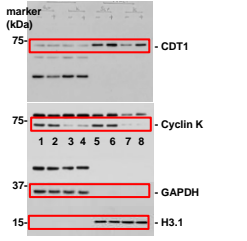

Figure 6a

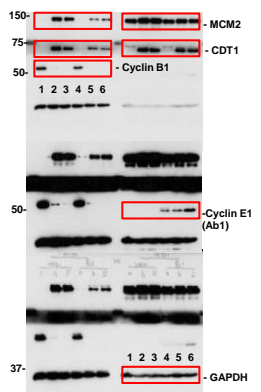

Figure 6b

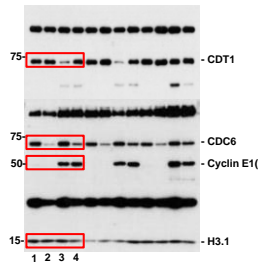

Figure 5k

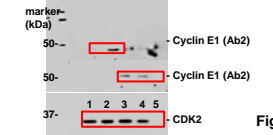

Figure 6f

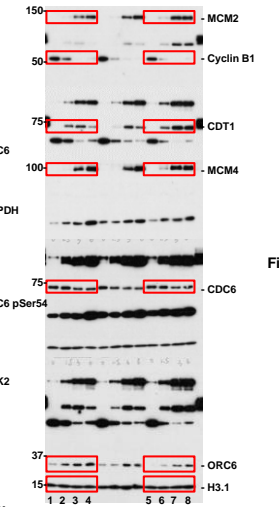

Figure 6g

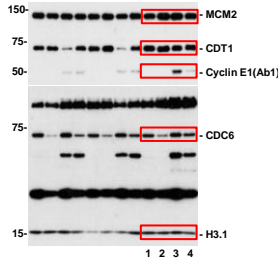

Figure 6c

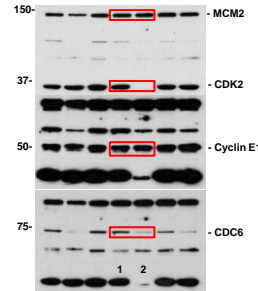

Figure 6e

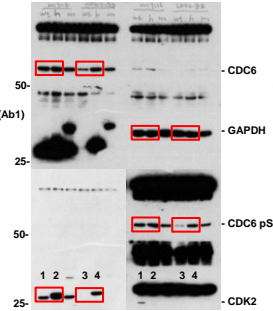

Figure 7a

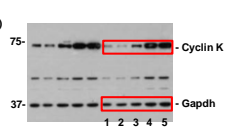

Suppl Fig 1a

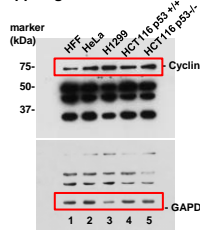

Suppl Fig 1b

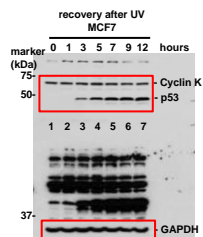

Suppl Fig 1c

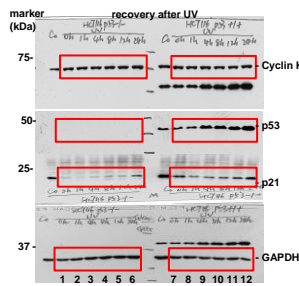

Suppl Fig 1d

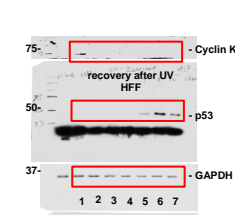

Suppl Fig 4a

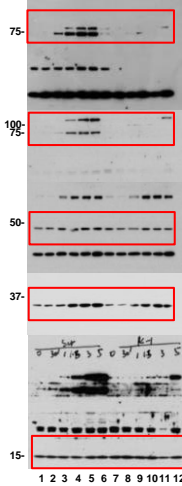

Suppl Fig 4b

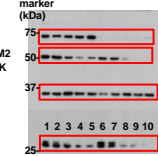

Suppl Fig 4c

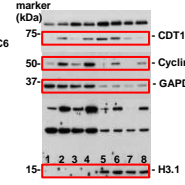

Suppl Fig 4d

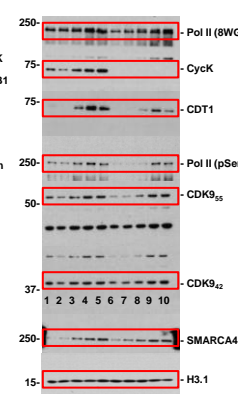

Suppl Fig 4e

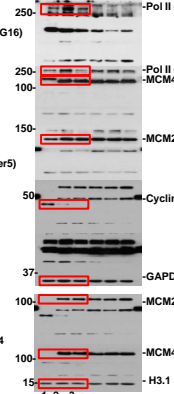

Suppl Fig 4g

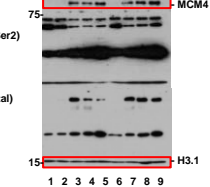

Suppl Fig 4h

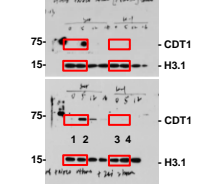

Suppl Fig 4f

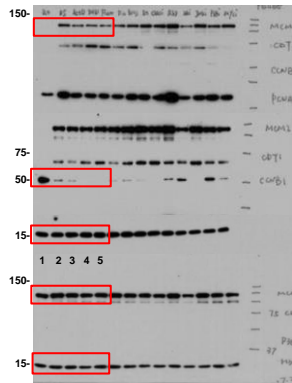

Suppl Fig 5a

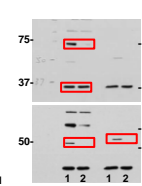

Suppl Fig 6

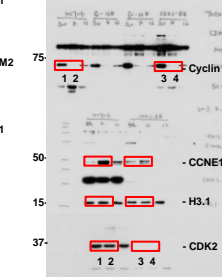

Suppl Fig 5b

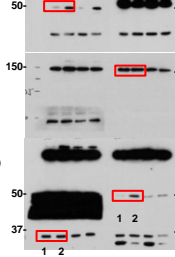

Suppl Fig 7

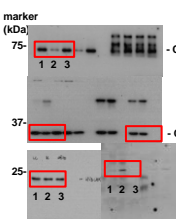

Suppl Fig 5b

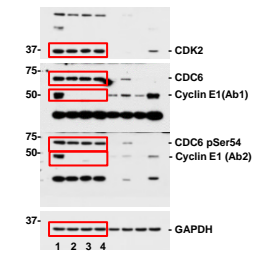

Suppl Fig 8

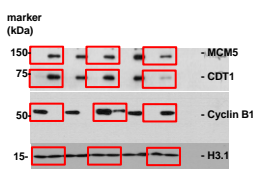

Suppl Fig 5c

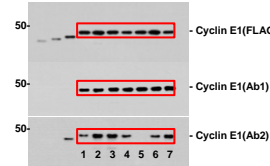

**Supplementary Table 1: list of primes and oligos**

| Primers and oligos                                           | Sequence 5'-3'                                                                                            |
|--------------------------------------------------------------|-----------------------------------------------------------------------------------------------------------|
| shRNA-Cyclin K targeting sequence 1                          | GCAGGACGTTTGTGCAAATTT                                                                                     |
| shRNA-Cyclin K targeting sequence 2                          | CCACCAAATCCTGGATCTTTA                                                                                     |
| shRNA-CDK12 targeting sequence                               | GCACTGAAAGAGGAGATTGTT                                                                                     |
| CCNE1 targeting gRNA1                                        | CCTCGCCGTCCTGTCGATTT                                                                                      |
| CCNE1 targeting gRNA2                                        | CCAAAATCGACAGGACGGCG                                                                                      |
| CDK2 targeting gRNA1                                         | GGCGCTTAAGAAAATCCGCC                                                                                      |
| CDK2 targeting gRNA2                                         | GATCTCTCGGATGGCAGTAC                                                                                      |
| PCR primers to validate Cyclin E1 KO                         | forward, ACACCATGAAGGAGGACGG<br>reverse, GCTGTGGCTGCATTAGAGA                                              |
| PCR primers to validate CDK2 KO                              | forward, TATACTGCGTTCCATCCC<br>reverse, GCATTACCTTGATGAGGG                                                |
| qPCR primers targeting CDS to validate Cyclin K knockdown    | forward, AAAGACTTGGCTCATACACCC<br>reverse, CAGTTGCCAGGGTATCATAGTG                                         |
| qPCR primers targeting 3' UTR to validate Cyclin K knockdown | forward, CAGCCTGGATGAGATAACGT<br>reverse, TTCCCATACTGCAACTGTCTG                                           |
| qPCR primers targeting CDS to validate CDK12 knockdown       | forward, CTTGCTCGGCTCTATAACTCTG<br>reverse, TTCCCCAAGAATACATCCACAG                                        |
| Cyclin K cloning                                             | forward, GAGGATCCATGAAGGAGAATAAAGAAAAT<br>reverse, GATCTAGATTACTTGTCGTCATCGTCTTTG<br>TAGTCTCTCATCCAGGCTGC |
| shRNA-resistant human Cyclin K                               | forward, CTCGCAGGACGTTTATGTAAGTTTGAATACAAG<br>reverse, CTTGTATTTCAAACCTACATAAACGTCCTGCGAG                 |



|                                      |                                                                                                                |
|--------------------------------------|----------------------------------------------------------------------------------------------------------------|
| Cyclin B1 cloning                    | forward, GTTCTAGACACCATGGCGCTCCGAGTCACC<br>reverse, GTGGATCCTTACTTGTTCGTCATCGTCTTTGTAGT<br>CCACCTTTGCCACAGCCTT |
| Cyclin E1 cloning                    | forward, GTGAATTCACCATGCCGAGGGAGCGCAG<br>reverse, GTTCTAGATTACTTGTTCGTCATCGTCTTTGTAG<br>TCCGCCATTTCCGGCCCCGCT  |
| Cyclin E1 truncation (1-327) cloning | forward, GTGAATTCACCATGCCGAGGGAGCGCAG<br>reverse, GTTCTAGATTACTTGTTCGTCATCGTCTTTGTAG<br>TCACAGTTCTCTATGTCGCA   |
| Cyclin E1 truncation (1-355) cloning | forward, GTGAATTCACCATGCCGAGGGAGCGCAG<br>reverse, GTTCTAGATTACTTGTTCGTCATCGTCTTTGTAGT<br>CTTCATCAGCGACGCCCT    |
| Cyclin E1 truncation (1-382) cloning | forward, GTGAATTCACCATGCCGAGGGAGCGCAG<br>reverse, GTTCTAGATTACTTGTTCGTCATCGTCTTTGTAGTC<br>TTCAGACAACATGGCTTT   |
| Cyclin E1 T362A mutation             | forward, CACACAACATACAGGCCACAGAGAC<br>reverse, GTCTCTGTGGCCTGTATGTTGTGTG                                       |
| Cyclin E1 T362E mutation             | forward, CACACAACATACAGGAACACAGAGAC<br>reverse, GTCTCTGTGTTCCCTGTATGTTGTGTG                                    |
| Cyclin E1 S366A mutation             | forward, GTCCAGCAAATCCAAGGCGTCTCTGTG<br>reverse, CACAGAGACGCCTTGGATTTGCTGGAC                                   |
| Cyclin E1 S366D mutation             | forward, GTCCAGCAAATCCAAGTCGTCTCTGTG<br>reverse, CACAGAGACGACTTGGATTTGCTGGAC                                   |
| Cyclin E1 S381A mutation             | forward, GAAAGCCATGTTGGCTGAACAAAATAGGG<br>reverse, CCCTATTTTGTTTCAGCCAACATGGCTTTC                              |
| Cyclin E1 S381D mutation             | forward, GAAAGCCATGTTGGATGAACAAAATAGGG<br>reverse, CCCTATTTTGTTTCATCCAACATGGCTTTC                              |
